# Supplementary material
Source: Springer Nature journal article supplement (https://www.springermedizin.de/resource/supplementary/12943_2012_1092_MOESM4_ESM.pdf/9552468)
Supplement: MOESM4 [file 9552468]

**A**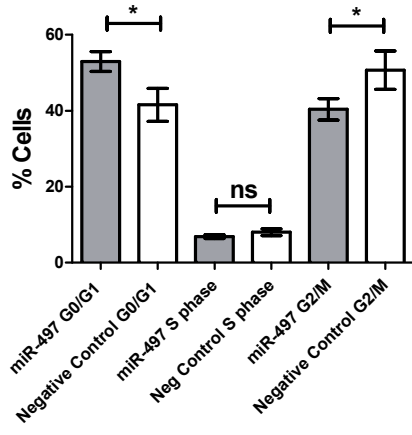**B**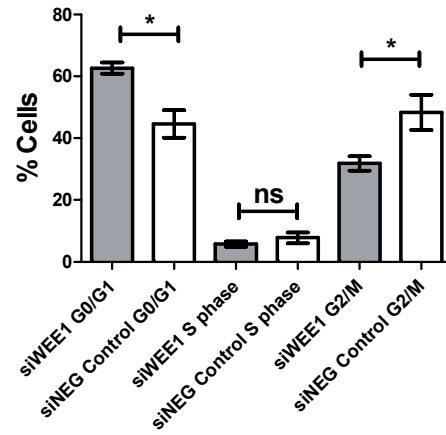**C****miR-497 Kelly**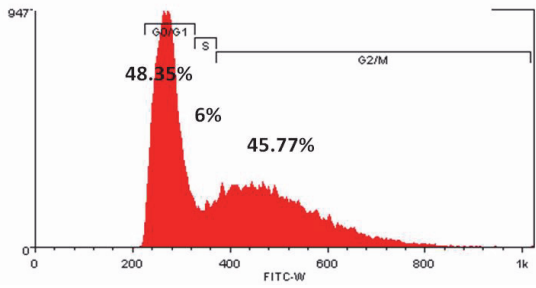**Neg Control Kelly**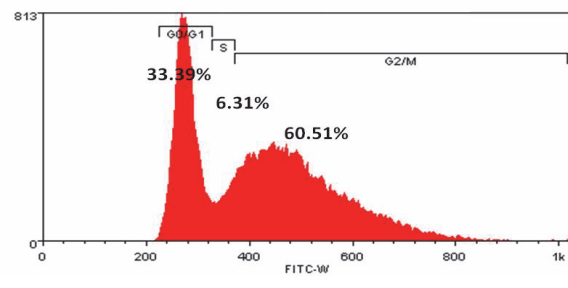**siWEE1 Kelly**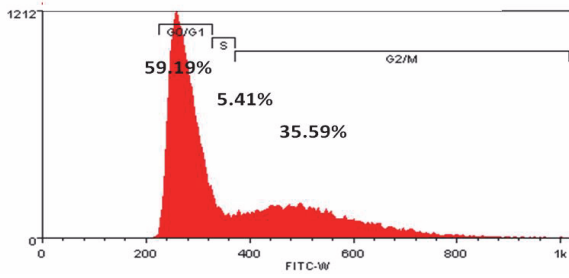**siNEG Control Kelly**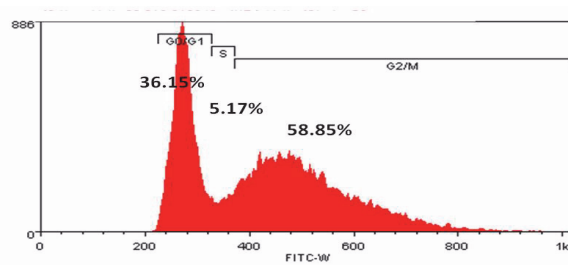**D**
